# Supplementary material for: NG2 as an Identity and Quality Marker of Mesenchymal Stem Cell Extracellular Vesicles
Source: PubMed Central journal article supplement (PMC6953102; doi:10.3390/cells8121524), 2019-11-27
Supplement: cells-08-01524-s001.pdf [file cells-08-01524-s001.pdf]

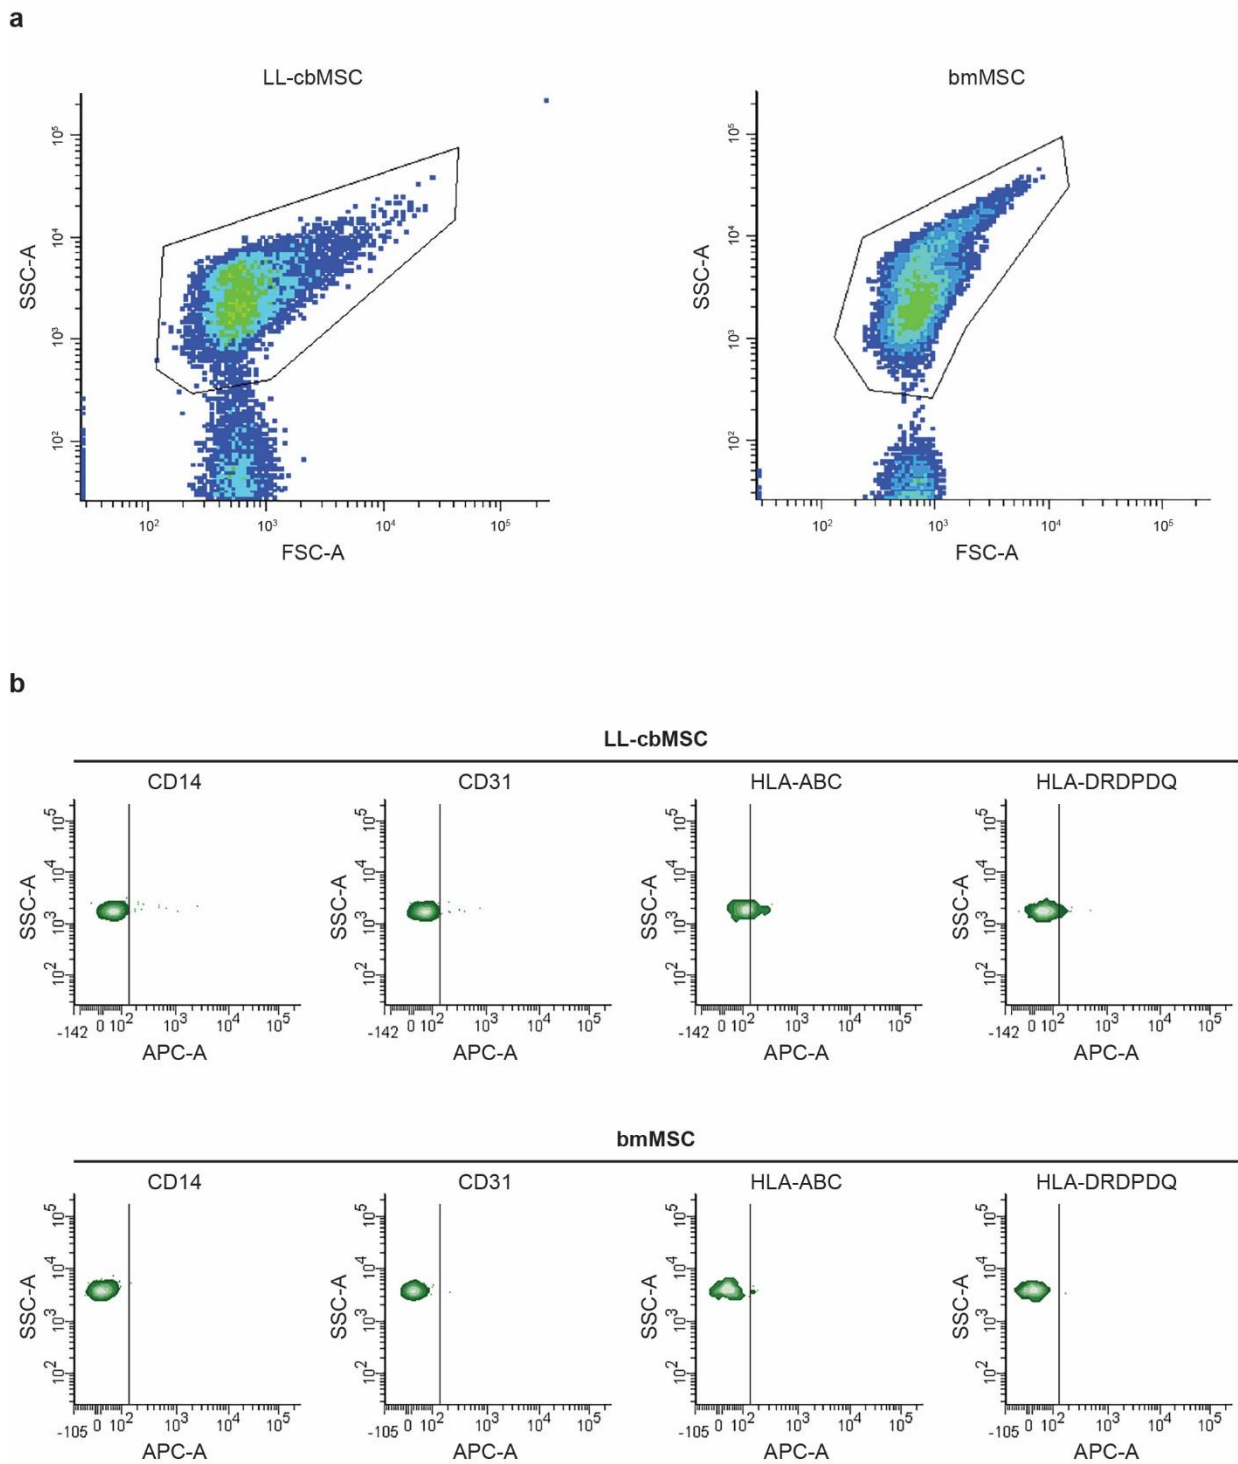

**Supplementary Figure S1.** Flow cytometry analyses of MSC EV. **(a)** Representative flow cytometry density plot showing morphological gate used to select extracellular vesicles for further analysis. **(b)** Representative flow cytometry density plots showing fluorescent signal as detected by APC-A channel for different antigens. The vertical bar marks positivity for APC-A signal.

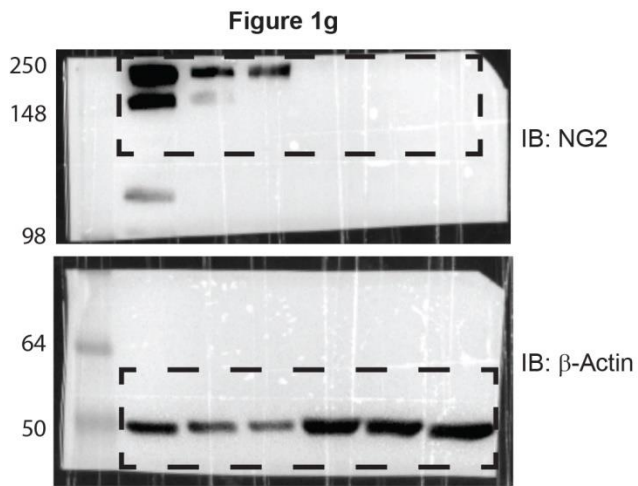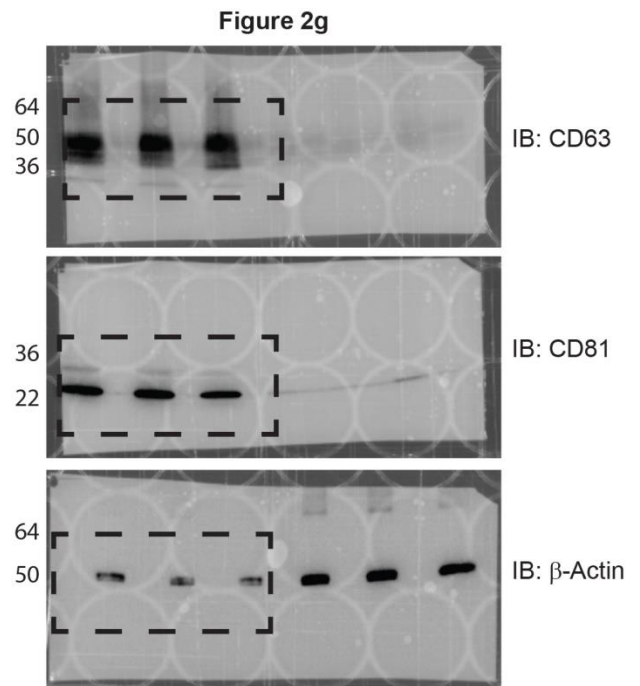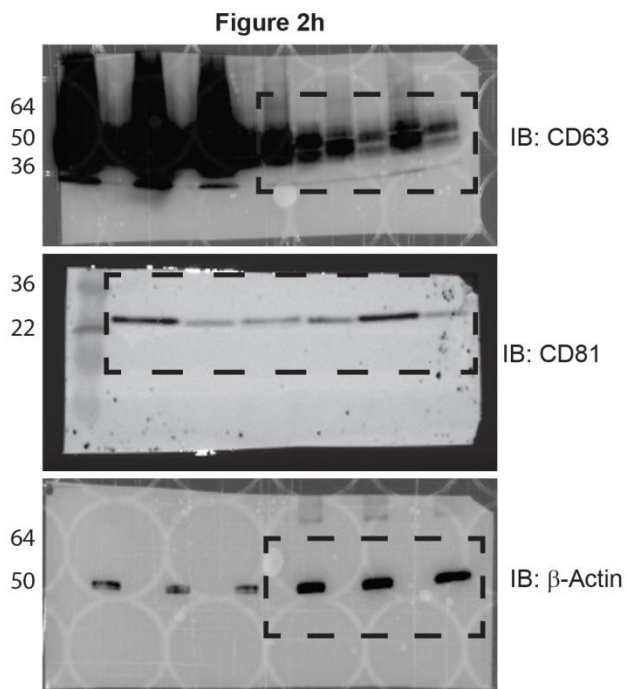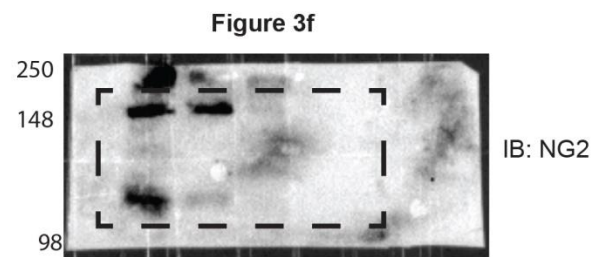

**Supplementary Figure S2.** Western blot analyses of MSC and MSC EV. Uncropped images of western analysis membranes showed in the specified main figures. Molecular weight marker bands are indicated. IB, immunoblot.
